# Supplementary material
Source: Springer Nature journal article supplement (https://mijn.bsl.nl/resource/supplementary/13047_2013_781_MOESM2_ESM.pdf/7113076)

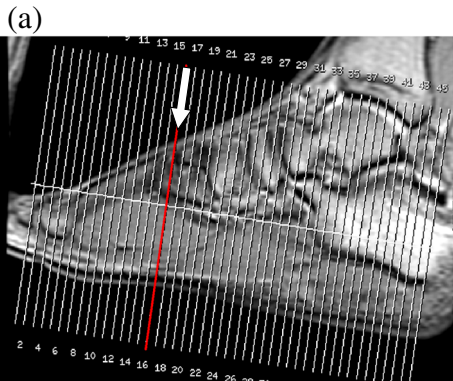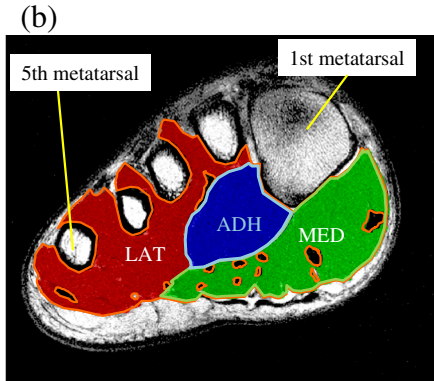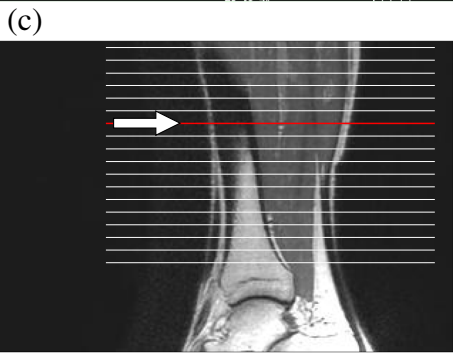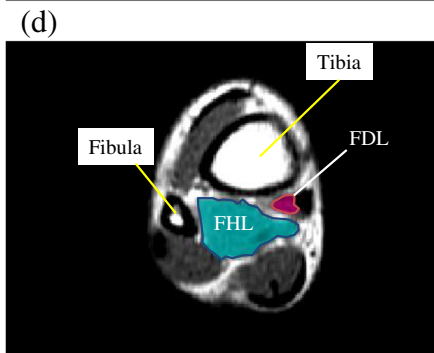

Supplement: MOESM2 [file 7113076]
